# Supplementary material for: Site-specific doping of silver atoms into a Au25 nanocluster as directed by ligand binding preferences
Source: PubMed Central journal article supplement — Chem Sci. 2022 Mar 15;13(18):5148–54. doi: 10.1039/d2sc00012a (PMC9093122; doi:10.1039/d2sc00012a), 2022-03-15
Supplement: SC-013-D2SC00012A-s001.pdf [file SC-013-D2SC00012A-s001.pdf]

## Supporting Information:

### Site-Specific Doping of Silver Atoms into Au<sub>25</sub> Nanocluster as Directed by Ligand Binding Preference

Wan-Qi Shi,<sup>a</sup> Zong-Jie Guan,<sup>a</sup> Jiao-Jiao Li,<sup>a</sup> Xu-Shuang Han,<sup>a</sup> and Quan-Ming Wang<sup>\*ab</sup>

a. Department of Chemistry, Tsinghua University, Beijing, 100084, PR China.

b. Department of Chemistry, College of Chemistry and Chemical Engineering, Xiamen University, Xiamen, 361005, PR China.

## I. Characterization

Figure.

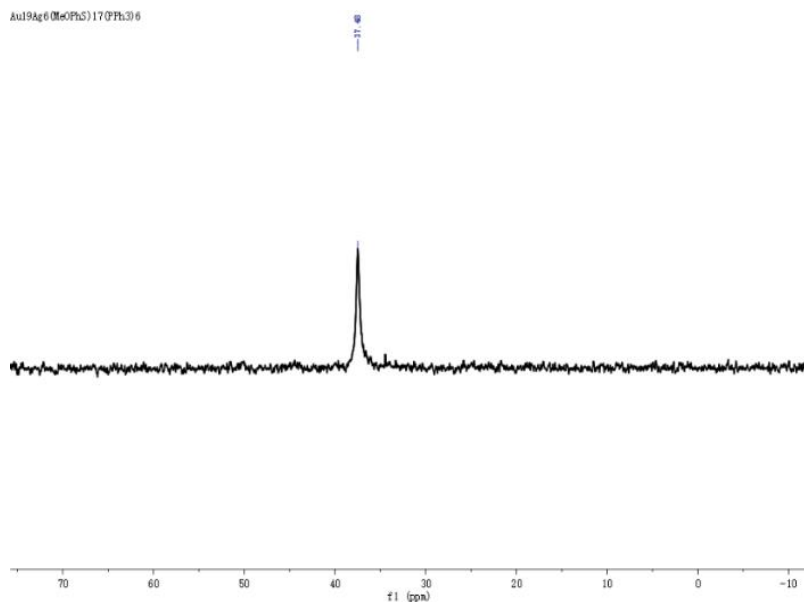

Fig. S1.  $^{31}\text{P}$ -NMR spectrum of  $\text{Au}_{19}\text{Ag}_6$  in  $\text{CD}_2\text{Cl}_2$ .

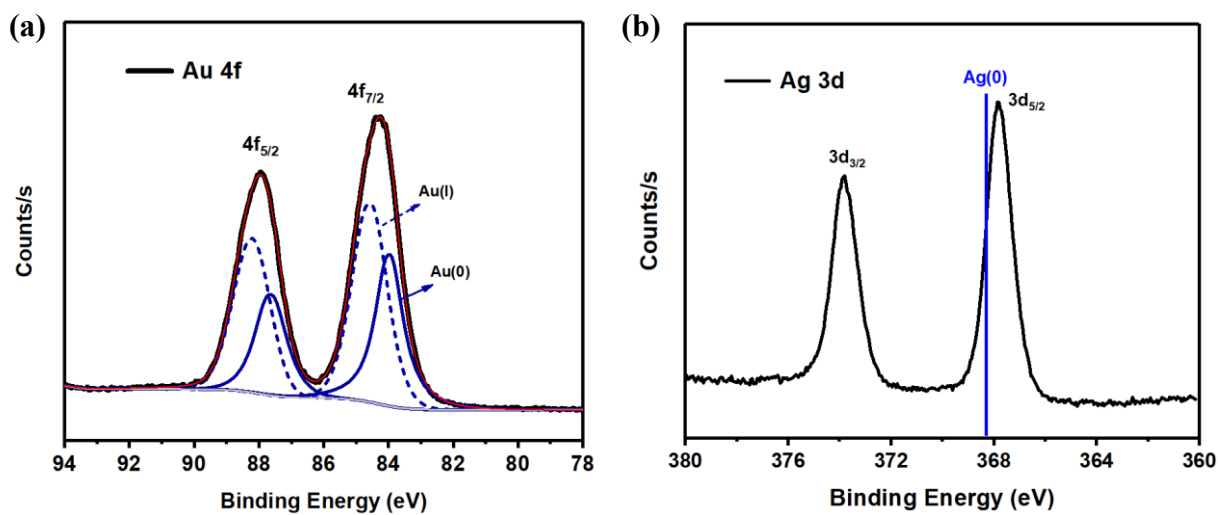

Fig. S2. (a) Au 4f XPS spectrum and (b) Ag 3d XPS spectrum of  $\text{Au}_{19}\text{Ag}_6$ .

**Table S1.** The transitions corresponding to the significant peaks of **Au<sub>19</sub>Ag<sub>6</sub>** calculated according to TDDFT method using the quantum chemistry program Gaussian 16.

| <i>Transition</i>         | <i>Coefficient</i> | <i>Contribution</i> <sup>#</sup> | <i>E (eV) / λ<sub>cal.</sub> (nm)</i> | <i>Oscillator Strength</i> | <i>λ<sub>exp.</sub> (nm)</i> |     |
|---------------------------|--------------------|----------------------------------|---------------------------------------|----------------------------|------------------------------|-----|
| <b>α</b><br>(HOMO→LUMO+1) | 434→437            | -0.30943                         | 19.149%                               | 2.76 / 449                 | 0.1891                       |     |
|                           | 434→438            | 0.36975                          | 27.343%                               |                            |                              |     |
|                           | 435→437            | -0.35593                         | 25.337%                               | 2.77 / 448                 | 0.2036                       |     |
|                           | 435→438            | -0.32524                         | 21.156%                               |                            |                              |     |
|                           | 434→437            | 0.35640                          | 25.404%                               |                            |                              |     |
|                           | 434→438            | 0.32417                          | 21.017%                               |                            |                              |     |
|                           | 435→437            | -0.30905                         | 19.102%                               |                            |                              | 463 |
|                           | 435→438            | 0.36809                          | 27.098%                               |                            |                              |     |
| <b>β</b><br>(HOMO→LUMO+2) | 435→439            | 0.63482                          | 80.599%                               | 3.36 / 369                 | 0.1492                       | 390 |
|                           | 434→439            | 0.64224                          | 82.494%                               | 3.37 / 368                 | 0.1509                       |     |

*#: Contribution = (Coefficient)<sup>2</sup>/0.5; 435: HOMO; 436: LUMO*

**Table S2.** Crystal data and structure refinement for **Au<sub>19</sub>Ag<sub>6</sub>**.

|                                                               |                                                                                                                                                 |
|---------------------------------------------------------------|-------------------------------------------------------------------------------------------------------------------------------------------------|
| Empirical formula                                             | C <sub>227</sub> H <sub>209</sub> Ag <sub>6</sub> Au <sub>19</sub> B <sub>2</sub> F <sub>8</sub> O <sub>17</sub> P <sub>6</sub> S <sub>17</sub> |
| Formula weight                                                | 8502.97                                                                                                                                         |
| Temperature/K                                                 | 172.98(10)                                                                                                                                      |
| Crystal system                                                | triclinic                                                                                                                                       |
| Space group                                                   | <i>P</i> -1                                                                                                                                     |
| <i>a</i> /Å                                                   | 20.4536(6)                                                                                                                                      |
| <i>b</i> /Å                                                   | 20.7898(7)                                                                                                                                      |
| <i>c</i> /Å                                                   | 33.6586(9)                                                                                                                                      |
| <i>α</i> /°                                                   | 72.945(3)                                                                                                                                       |
| <i>β</i> /°                                                   | 82.104(2)                                                                                                                                       |
| <i>γ</i> /°                                                   | 63.917(3)                                                                                                                                       |
| Volume/Å <sup>3</sup>                                         | 12289.0(7)                                                                                                                                      |
| <i>Z</i>                                                      | 2                                                                                                                                               |
| $\rho_{\text{calc}}/\text{cm}^3$                              | 2.298                                                                                                                                           |
| $\mu/\text{mm}^{-1}$                                          | 26.656                                                                                                                                          |
| <i>F</i> (000)                                                | 7868.0                                                                                                                                          |
| Crystal size/mm <sup>3</sup>                                  | 0.1 × 0.03 × 0.03                                                                                                                               |
| Radiation                                                     | Cu K $\alpha$ ( $\lambda$ = 1.54184)                                                                                                            |
| 2 $\Theta$ range for data collection/°                        | 7.268 to 128.994                                                                                                                                |
| Index ranges                                                  | -23 ≤ <i>h</i> ≤ 18, -24 ≤ <i>k</i> ≤ 23, -39 ≤ <i>l</i> ≤ 38                                                                                   |
| Reflections collected                                         | 77948                                                                                                                                           |
| Independent reflections                                       | 39715 [ <i>R</i> <sub>int</sub> = 0.0992, <i>R</i> <sub>sigma</sub> = 0.1322]                                                                   |
| Data/restraints/parameters                                    | 39715/1743/2266                                                                                                                                 |
| Goodness-of-fit on <i>F</i> <sup>2</sup>                      | 0.944                                                                                                                                           |
| Final <i>R</i> indexes [ <i>I</i> >= 2 $\sigma$ ( <i>I</i> )] | <i>R</i> <sub>1</sub> = 0.0853, <i>wR</i> <sub>2</sub> = 0.2065                                                                                 |
| Final <i>R</i> indexes [all data]                             | <i>R</i> <sub>1</sub> = 0.1545, <i>wR</i> <sub>2</sub> = 0.2442                                                                                 |
| Largest diff. peak/hole / e Å <sup>-3</sup>                   | 2.25/-2.32                                                                                                                                      |
